# Supplementary material
Source: PubMed Central journal article supplement (PMC7833270)
Supplement: mmc1.pdf [file mmc1.pdf]

# THE LANCET

## **Supplementary appendix**

This appendix formed part of the original submission. We post it as supplied by the authors.

Supplement to: Priesemann V, Brinkmann MM, Ciesek S, et al. Calling for pan-European commitment for rapid and sustained reduction in SARS-CoV-2 infections. *Lancet* 2020; published online Dec 18. [http://dx.doi.org/10.1016/S0140-6736\(20\)32625-8](http://dx.doi.org/10.1016/S0140-6736(20)32625-8).

*A website with translations of the statement, further signatories and additional information is available at: [www.containcovid-pan.eu](http://www.containcovid-pan.eu)*

### **Signatories in alphabetical order**

Judith Aberle, Center for Virology, Medical University of Vienna, Vienna, Austria

Wolfgang Ahrens, Epidemiological Methods and Etiological Research, Leibniz-Institute for Prevention Research and Epidemiology - BIPS and University of Bremen, Bremen, Germany

Tuomas Aivelo, Organismal and Evolutionary Biology research program, University of Helsinki, Helsinki, Finland

Miguel Almunia, Colegio Universitario de Estudios Financieros (CUNEF), Madrid, Spain

Covadonga Alonso, INIA CSIC, Madrid, Spain

Iris Iglesia Altaba, Growth, Exercise, Nutrition and Development Research group, Instituto de Investigación Sanitaria de Aragón, Zaragoza, Spain

Thomas Altenhöner, Faculty of Social Sciences, FH Bielefeld University of Applied Sciences, Bielefeld, Germany

Christian L. Althaus, Institute of Social and Preventive Medicine, University of Bern, Bern, Switzerland

Gregor Anderluh, Director of National institute of Chemistry, Ljubljana, Slovenia

Emmanuel André, Department of Microbiology, Immunology and Transplantation, KU Leuven, Leuven, Belgium

Christian Apfelbacher, Institute of Social Medicine and Health Systems Research, Otto von Guericke University Magdeburg, Magdeburg, Germany

Alex Arenas, Department of Computer Science and Mathematics, Universitat Rovira i Virgili, Tarragona, Spain

Malta Obesity Association, Malta

Amrish Y. Baidjoe, London School of Hygiene and Tropical Medicine, London, UK, and President of the EPIET Alumni Network, and Dutch RedTeam, the Netherlands

Tariq Baig-Meininghaus, Max Planck Institute for Dynamics and Self-Organization, Göttingen, Germany

Oliver Bajt, National institute of Biology, Ljubljana, Slovenia

Rudi Balling, Director LCSB, University of Luxembourg, Luxembourg

Fausto Baldanti, Department of Clinical, Surgical, Diagnostic and Pediatric Sciences, University of Pavia, Molecular Virology Unit, IRCCS Policlinico San Matteo, Pavia, Italy

Ralf Bartenschlager, Department of Infectious Diseases, Molecular Virology, Heidelberg University, Heidelberg, Germany

Federico Battiston, Department of Network and Data Science, Central European University, Vienna, Austria

Fabien Besançon, Maison médicale d'Egly, Egly, France

Yaneer Bar-Yam, New England Complex Systems Institute, Cambridge, MA, USA

Markus Beier, General Practitioner and Chairman, Bavarian General Practitioner Organisation (BHÄV), Germany

Enrique Garcia Bengoechea, University of Limerick, Limerick, Ireland

Guy Berchem, Medical Oncology, Medical director, Luxembourg Institute of Health, Luxembourg, Luxembourg

Ulrich Berger, Economics, WU Vienna, Vienna, Austria

Philippe Beutels, Centre for Health Economics Research & Modelling Infectious Diseases, University of Antwerp, Belgium

Clíodhna Ni Bhuachalla, School of Public Health, University College Cork, Ireland

Wolfgang Bock, TU Kaiserslautern, Kaiserslautern, Germany

Eberhard Bodenschatz, LFPB, Max Planck institute for Dynamics and Self-Organisation, Goettingen, Germany

Denny Borsboom, Department of Psychology, University of Amsterdam, Amsterdam, The Netherlands

Quirine ten Bosch, Wageningen University, The Netherlands

Martin Bootsma, University Medical Center Utrecht, Utrecht, The Netherlands

Debby Bogaert, University of Edinburgh, Edinburgh, UK

Anton Brancelj, EKOS, National Institute of Biology, Ljubljana, Slovenia

Melanie Brinkmann, Technische Universität Braunschweig, Helmholtz Zentrum für Infektionsforschung, Braunschweig, Germany

Dirk Brockmann, Dept. of Biology, Humboldt University of Berlin and Robert Koch - Institute, Berlin, Germany

Raffaele Bruno, Department of Clinical, Surgical, Diagnostic, and Paediatric Sciences, University of Pavia and Division of Infectious Diseases I, Fondazione IRCCS Policlinico San Matteo, Pavia, Italy

Nele Brusselaers, Global Health Institute, Antwerp University, Belgium; Karolinska Institutet, Sweden

Claire Buckley, Public Health Medicine, Health Service Executive, Ireland

Javier Buesa, Faculty of Medicine, University of Valencia, Valencia, Spain

Danilo Buonsenso, Department of Woman and Child Health and Public Health, Fondazione Policlinico Universitario A. Gemelli IRCCS, Rome, Italy

Arnold Bosman, Public Health Response Expert, Houten (Utrecht), The Netherlands

Reinhard Busse, co-director, European Observatory on Health Systems and Policies; Professor and Head of the Department of Health Care Management, Technische Universität Berlin, Germany

Alena Buyx, Technical University Munich, Munich, Germany

Neville Calleja, Faculty of Medicine & Surgery, University of Malta, Malta

Lars Calmfors, Institute for International Economic Studies, Stockholm University and Research Institute for Industrial Economics, Sweden

David A. Cameron, University of Edinburgh Cancer Centre, IGMM, Edinburgh, UK

Klemen Čandek, Department of Organisms and Ecosystems Research, National Institute of Biology, Ljubljana, Slovenia

Josip Car, Department of Primary Care and Public Health, School of Public Health, Imperial College London, London, UK and Lee Kong Chian School of Medicine, NTU Singapore, Singapore

Marcus Carlsson, Centre for the Mathematical Sciences, Lund University, Sweden

Zdenka Čebašek-Travnik, President of Medical chamber of Slovenia, Ljubljana, Slovenia

Krishnendu Chatterjee, IST, Austria

N.H.Chavannes, LUMC Leiden University Medical Centre, Leiden, The Netherlands

Meena Nathan Cherian, Geneva Foundation for Medical Education and Research, Versoix, Switzerland

Luka Čičin-Šain, Helmholtz Zentrum für Infektionsforschung, Braunschweig, Germany

Sandra Ciesek, University Hospital, Goethe-University Frankfurt, Frankfurt, Germany

Rok Čivljak, University of Zagreb School of Medicine; “Dr. Fran Mihaljević” University Hospital for Infectious Diseases, Zagreb, Croatia

Tim Colbourn, UCL Institute for Global Health, London, UK

Pasquale Comberiati, Department of Clinical and Experimental Medicine, Pediatric Section, University of Pisa, Pisa, Italy

Sebastian Contreras, Max Planck Institute for Dynamics and Self-Organization, Göttingen, Germany

Dominique Costagliola, Institut Pierre Louis d'Epidémiologie et de Santé Publique, INSERM and Sorbonne Université, Paris, France

Jesús Crespo Cuaresma, Vienna University of Economics and Business, Vienna, Austria

Nessa Cronin, Centre for Irish Studies and Moore Institute, NUI Galway, Ireland

Sarah Cuschieri, Faculty of Medicine & Surgery, University of Malta, Msida, Malta

Delpierre Cyrille, UMR 1027, INSERM, Toulouse, France

Thomas Czypionka, Institute for Advanced Studies, Vienna, Austria and London School of Economics, London, UK

Conchita D'Ambrosio, Department of Behavioural and Cognitive Sciences, University of Luxembourg, Luxembourg

Jörg Danzer, boden & grundwasser Allgäu GmbH, Sonthofen, Germany

Nicolas Dauby, CHU Saint-Pierre, Brussels, Belgium

Mart C.M. de Jong, Quantitative Veterinary Epidemiology, WageningenUR, Wageningen, The Netherlands

Isabel de la Fuente, Centre Hospitalier Luxembourg, Luxembourg

Mathias Dewatripont, Université libre de Bruxelles, Brussels, Belgium

Ivan Đikić, University Hospital, Goethe University Frankfurt, Frankfurt, Germany

Ulf Dittmer, University Clinic Essen, Essen, Germany

Helen Dolk, Ulster University, Coleraine, UK

Lars Dölken, Institute for Virology and Immunology, Julius-Maximilians-University of Würzburg, Würzburg, Germany

Marcus Dörr, University Medicine Greifswald, Greifswald, Germany

Jennifer Dowd, Deputy Director, Leverhulme Centre for Demographic Science, University of Oxford, UK

Christian Drosten, Institute of Virology, Charité – Berlin University of Medicine, Berlin, Germany

John Drury, Director of Research and Knowledge Exchange in the School of Psychology, University of Sussex, SPI-B advisory sub-group of SAGE, Independent SAGE, UK

Uga Dumpis, University of Latvia, Riga, Latvia

Jerzy Duszynski, President of the Polish Academy of Sciences and Nencki Institute of Experimental Biology, PAS, Warsaw, Poland

Isabella Eckerle, University Hospitals Geneva & University of Geneva, Switzerland

Matthias Egger, Institute of Social and Preventive Medicine, University of Bern, Bern, Switzerland

Igor Emri, Faculty of Mechanical Engineering, University of Ljubljana, Ljubljana, Slovenia

Florian Englmaier, Department of Economics, Ludwig-Maximilians-University of Munich, Munich, Germany

Ernesto Estrada, University of Zaragoza, Zaragoza, Spain

Martin Exner, University Hospital Bonn, Institute of Hygiene and Public Health, Bonn, Germany

Federico Fabbrini, School of Law & Government and Director of Brexit Institute, Dublin City University, Ireland

Christine S Falk, Hannover Medical School, Institute of Transplant Immunology, Hannover, Germany

Tove Fall, Uppsala University, Uppsala, Sweden

Jacques Fellay, Groupe Fellay, EPFL; Head of Precision Medicine at the University Hospital (CHUV) in Lausanne, Switzerland

Elena Felice, University of Malta, Msida, Malta

Ethel Felice, Faculty of Medicine & Surgery, University of Malta, Msida, Malta

Mariet Feltkamp, Leiden University Medical Center, Leiden, The Netherlands

Nicole Fischer, University Medical Center Hamburg-Eppendorf, Hamburg, Germany

Thea K Fischer, Northern Zealand Hospital and University of Copenhagen, Copenhagen, Denmark

Vojko Flis, Director of Maribor University Medical Centre, Maribor, Slovenia

Alexandros A. Fragkopoulos, Department of Complex Fluids, Max Planck Institute for Dynamics and Self-Organization, Goettingen, Germany

Janja Francé, Marine Biology Station Piran, National Institute of Biology, Piran, Slovenia

Paul Frappé, Collège de la Médecine Générale / French College of General Practice, Paris, France

Christophe Fraser, Nuffield Department of Medicine, University of Oxford, Oxford, UK

Daan Frenkel, Molecular Simulation, Department of Chemistry, University of Cambridge, Cambridge, UK

Alex W. Friedrich, Medical Microbiology and Infection Prevention, University Medical Center Groningen, Groningen, Netherlands

Karl Friston, Wellcome Principal Research Fellow and Scientific Director, Wellcome Trust Centre for Neuroimaging; Institute of Neurology, University College London, UK, Honorary Consultant: The National Hospital for Neurology and Neurosurgery

Clemens Fuest, President of the Ifo Institute for Economic Research, Munich, Germany

Sebastian Funk, London School of Hygiene & Tropical Medicine, London, UK

Nataliya Nikolaeva Gabrovska, MHATLD "St. Sofia", Children department, Medical University - Sofia, Sofia, Bulgaria

Anna Gambin, Faculty of Mathematics, Informatics and Mechanics, University of Warsaw, Warsaw, Poland

Hans-Martin von Gaudecker, University of Bonn and Institute of Labor Economics (IZA), Bonn, Germany

Marius Gilbert, FNRS research Director, Université Libre de Bruxelles, Brussels, Belgium

Giulia Giordano, University of Trento, Trento, Italy

Paolo Giudici, Professor of Statistics and coordinator of the European PERISCOPE project, University of Pavia, Pavia, Italy

Enrico Glaab, Luxembourg Centre for Systems Biomedicine, University of Luxembourg, Belval, Luxembourg

Nina Gobat, Nuffield Department of Primary Care Health Sciences, University of Oxford, Oxford, UK

Guy-philippe Goldstein, Ecole de Guerre Economique, Paris, France

Manuel Carmo Gomes, Faculdade de Ciências da Universidade de Lisboa, Lisbon, Portugal

Jorge Goncalves, Luxembourg Centre for Systems Biomedicine, University of Luxembourg, Luxembourg

Herman Goossens, University of Antwerp, Belgium

Nina Gorišek Miksić, University Medical Centre Maribor, Maribor, Slovenia

Georg Gottlob, Department of Computer Science, University of Oxford, Oxford, UK

Jürgen Graf, Medical Director, University Hospital Frankfurt, Germany

Victor Grech, Faculty of Medicine & Surgery, University of Malta, Msida, Malta

Eva Grill, Institute for Medical Information Processing, Biometry and Epidemiology Ludwig-Maximilians-Universität München, München, Germany

Claudius Gros, Institute for Theoretical Physics, Goethe University Frankfurt, Germany

Daniel Gros, Centre for European Policy Studies (CEPS), Brussels, Belgium

Trish Greenhalgh, Primary Care Health Sciences, University of Oxford, UK

Adam Grundhoff, Heinrich Pette Institute, Leibniz Institute for Experimental Virology, Hamburg, Germany

Jochen Guck, Max-Planck-Zentrum für Physik und Medizin, Erlangen, Germany

Deepti Gurdasani, Queen Mary University of London, London, UK

Wencke Gwozdz, Department of Consumer research, communication and nutrition sociology, Justus-Liebig-University, Gießen, Germany

Ville Häkkinen, Helsinki University Hospital, Helsinki, Finland

Marian-Gabriel Hâncean, University of Bucharest, Bucharest, Romania

Johanna Hanefeld, Department of Global Health and Development; London School of Hygiene and Tropical Medicine, London, UK, and Centre International Health Protection, Robert Koch - Institute, Berlin, Germany

Claudia Hanson, Karolinska Institutet, Stockholm, Sweden & London School of Hygiene & Tropical Medicine, London, UK

Gerald Haug, President of the German Academy of Sciences Leopoldina – National Academy of Sciences, Halle, Germany

Knut Heidemann, Max Planck Institute for Dynamics and Self-Organization, Göttingen, Germany

Matti Heino, University of Helsinki, Helsinki, Finland

Dirk Heinz, Scientific director of Helmholtz Centre for Infection Research, Braunschweig, Germany

Hartmut Hengel, Microbiology, Virology and Infection Prevention, Universitätsklinikum Freiburg, Freiburg, Germany

Niel Hens, Hasselt University, Hasselt & University of Antwerp, Antwerp, Belgium

Stephan Herminghaus, Dynamics of Complex Fluids, MPI for Dynamics and Self-Organization, Göttingen, Germany

Manfred Herrmann, Dept. of Human and Health Sciences, Universität Bremen, Bremen, Germany

Timothy SC Hinks, Respiratory immunology, Nuffield Department of Medicine, University of Oxford, Oxford, UK

Emma B Hodcroft, Institute of Social and Preventive Medicine, University of Bern, Bern, Switzerland

Pirta Hotulainen, Minerva Institute for Medical Research, Helsinki, Finland

Philipp Hövel, School of Mathematical Sciences, University College Cork, Ireland

Zoë Hyde, Western Australian Centre for Health and Ageing, University of Western Australia, Australia

Licia Iacoviello, Department of Medicine and Surgery, University of Insubria, Varese, Italia

Veronika Jäger, Institute of Epidemiology and Social Medicine, University of Münster, Germany

Roman Jerala, National institute of chemistry, Ljubljana, Slovenia

Jose-Luis Jimenez, University of Colorado-Boulder, USA

Stipan Jonjić, Faculty of Medicine, University of Rijeka, Rijeka, Croatia

Zdravko Kačič, Rector of University of Maribor, Maribor, Slovenia

Juho Kannala, Department of Computer Science, Aalto University, Aalto, Finland

Jussi Kauhanen, Institute of Public Health and Clinical Nutrition, University of Eastern Finland, Kuopio, Finland

Patricia Kearney, School of Public Health, University College Cork, Cork, Ireland

Michelle Kelly-Irving, Inserm-University Toulouse III Paul Sabatier, France

Katharina Kieslich, Department of Political Science, University of Vienna, Vienna, Austria

Gerry Killeen, University College Cork, Republic of Ireland

Lucija Klaric, MRC HGU IGMM, University of Edinburgh, UK

Peter Klimek, Medical University of Vienna and Complexity Science Hub Vienna, Vienna, Austria

Barbara Klink, National Center of Genetics, Laboratoire national de santé (LNS), Dudelange, Luxembourg

Stefan Kluge, Department of Intensive Care, University Medical Center Hamburg-Eppendorf, Germany

Mariette Knaap, Copernicus Institute for Sustainable Development, Utrecht University, Utrecht, The Netherlands

Michael M. Kochen, Emeritus Professor of General Practice (University of Goettingen), Institute of General Practice, University of Freiburg, Baden-Württemberg - Freiburg, Germany

Martin Kocher, Institute for Advanced Studies of Vienna, Vienna, Austria

Malte Kohns Vasconcelos, Institute for Medical Microbiology and Hospital Hygiene, Heinrich Heine University Düsseldorf, Düsseldorf, Germany

Branko Kolarić, University of Rijeka, Rijeka, Croatia

Jukka Koskela, Helsinki University Central Hospital and Institute for Molecular Medicine Finland (FIMM) University of Helsinki, Helsinki, Finland

Małgorzata Kossowska, Institute of Psychology, Jagiellonian University, Krakow, Poland

Kenn Konstabel, Department of Chronic Diseases, National Institute for Health Development, Tallinn, Estonia

Heyo Kroemer, Chief Executive Officer of Charité – Berlin University of Medicine, Berlin, Germany

Mirjam Kretzschmar, University Medical Center Utrecht, Utrecht, The Netherlands

Tyll Krueger, Faculty of Electronics, Wrocław University of Science and Technology and MOCOS research group, Wrocław, Poland

Ralf Krumkamp, Bernhard Nocht Institute for Tropical Medicine, Hamburg, Germany

Thomas Kubiak, Johannes Gutenberg University, Mainz, Germany

Matjaž Kuntner, Director of National Institute of Biology, Ljubljana, Slovenia

Klavdija Kutnar, Rector of University of Primorska, Koper, Slovenia

Karine Lacombe, Infectious Diseases Department, "Sorbonne Université, Hôpital St Antoine, APHP", Paris, France

Jeroen Lakerveld, Department of Epidemiology and Data Science, Amsterdam UMC, Amsterdam, The Netherlands



Berit Lange, Helmholtz Centre for Infection Research, Braunschweig, Germany

Nicola Latronico, Department of Anesthesia, Critical Care and Emergency, Spedali Civili University Hospital and University of Brescia, Brescia, Italy

Jari A. Laukkanen, Institute of Public Health and Clinical Nutrition, University of Eastern Finland, Kuopio, Finland

Fabio Lauria, Institute of Food Sciences, National Research Council, Avellino, Italy

Hakan Leblebicioğlu, Samsun VM Medicalpark Hospital, Samsun, Turkey

Helena Legido-Quigley, London School of Hygiene and Tropical Medicine, London the UK and Saw Swee Hock School of Public Health, National University of Singapore, Singapore

Christos Lionis, Clinic of Social and Family Medicine, Faculty of Medicine, University of Crete, Greece

Detlef Lohse, Physics of Fluids, University of Twente, The Netherlands

Edyta Łuszczki, Institute of Health Sciences, Medical College of Rzeszów University, Rzeszów, Poland

Mihaela Lupse, Infectious Diseases Department, University of Medicine and Pharmacy Cluj-Napoca, Romania

Brice Magdalou, Department of Economics, University of Montpellier, Montpellier, France

Azeem Majeed, Imperial College London, UK

Alenka Malej, retired marine biologist, Koper, Slovenia

Julian Mamo, Faculty of Medicine and Surgery, University of Malta, Msida, Malta

Klaus Markstaller, Department of Anaesthesia, Intensive Care Medicine and Pain Medicine, Medical University of Vienna, Vienna, Austria

Jose M Martin-Moreno, Preventive Medicine and Public Health, University of Valencia, Spain

Jutta Mata, Health Psychology, University of Mannheim, Germany

Martin McKee, London School of Hygiene & Tropical Medicine, London, UK

Joerg J Meerpohl, Institute for Evidence in Medicine, University of Freiburg, Freiburg, Germany

Julien Mercille, University College Dublin, Dublin, Ireland

Thomas Mertens, Chairman of STIKO, Institute of Virology, Ulm, Germany

Michael Meyer-Hermann, Department of Systems Immunology and Braunschweig Integrated Centre of Systems Biology, Helmholtz Centre for Infection Research, Braunschweig, Germany

Susan Michie, Professor of Health Psychology, University College London and Independent SAGE, UK

Rafael Mikolajczyk, Institute of Medical Epidemiology, Biometrics and Informatics, Medical Faculty of the Martin Luther University, Halle, Germany

Mojca Milavec, Department of Biotechnology and Systems Biology, National Institute of Biology, Ljubljana, Slovenija

Saskia S L Mol, Julius center for Health sciences and primary care, Utrecht University Medical centre, Utrecht, The Netherlands

Geert Molenberghs, Hasselt University, Hasselt & KU Leuven, Leuven, Belgium

Simon Attard Montalto, Faculty of Medicine & Surgery, University of Malta, Msida, Malta

Edgar Morgenroth, Business School, Dublin City University, Dublin, Ireland

Alekszej Morgunov, Department of Chemistry, University of Cambridge, Cambridge, UK

Visnja Mrdjen, Department of Clinical Microbiology, University Clinical Center of Republic of Srpska, Banja Luka, Republic of Srpska, Bosnia and Herzegovina

Annabel Mueller-Stierlin, Ulm University, Günzburg, Germany

Ruth Müller, Munich Center for Technology in Society, Technical University of Munich, Germany

Daniel Munblit, Department of Paediatrics and Paediatric Infectious Diseases, Institute of Child's Health, Sechenov First Moscow State Medical University (Sechenov University), Moscow, Russia

Christian Münch, University Hospital, Goethe University Frankfurt, Frankfurt, Germany  
Germany

Marjukka Myllärniemi, vice-dean of research of Medical Faculty, University of Helsinki, Helsinki, Finland

Armin Nassehi, Institute of Sociology, Ludwig-Maximilians-University of Munich, Munich, Germany

Heinrich H. Nax, University of Zurich, Zurich, Switzerland

Tobias Niedermaier, German Cancer Research Center, Heidelberg, Germany

Bert Niesters, University Medical Centre Groningen, Groningen, The Netherlands

Ana Maria Ribeiro Ferreira Nunes, Faculdade de Ciencias, Universidade de Lisboa, Lisbon, Portugal

Micheal O'Riordain, Department of Surgery, Mercy University Hospital & University College Cork, Ireland

Paulo Paixão, Nova Medical School, Lisbon, Portugal

Christina Pagel, Director of the Clinical Operational Research Unit at UCL and member of Independent SAGE, UK

Debabrata Panja, Department of Information and Computing Science, Utrecht University, Utrecht, The Netherlands

Marcus Panning, Medical Center – University of Freiburg, Freiburg, Germany

Igor Papič, Rector of University of Ljubljana, Ljubljana, Slovenia

Heikki Patomäki, The Helsinki Centre for Global Political Economy, University of Helsinki, Helsinki, Finland

George N. Pavlakis, Section Chief, Human Retrovirus Section, NCI, "Frederick, MD", USA

Katharina T. Paul, Department of Political Science, University of Vienna, Vienna, Austria

Jean-Michel Pawlotsky, Virologist, Department of Virology, "Henri Mondor University Hospital, Université Paris-Est & INSERM U955", Créteil, France

Elena Petelos, Clinic of Social and Family Medicine, Faculty of Medicine, University of Crete, Greece, and Maastricht University, The Netherlands

Andreas Peichl, ifo Institute – Leibniz Institute for Economic Research at the University of Munich, Munich, Germany

Matjaž Perc, University of Maribor, Maribor, Slovenia

Ivan J Perry, Dean of School of Public Health, University College Cork, Ireland

Marko Petek, Department of Biotechnology and Systems Biology, National Institute of Biology, Ljubljana, Slovenia

Boris Petelin, Marine Biology Station Piran, National Institute of Biology, Piran, Slovenia

Nicola Petrosillo, National Institute for Infectious Diseases “L. Spallanzani” IRCCS, Rome, Italy

Martyn Pickersgill, Centre for Biomedicine, Self and Society, The University of Edinburgh, Edinburgh, UK

Thomas Pietschman, Institute of Experimental Virology, Twincore Centre for Experimental and Clinical Infection Research, Hannover, Germany

Iris Pigeot, Leibniz Institute for Prevention Research and Epidemiology - BIPS, Bremen, Germany

Dominic Pimenta, Chairman of the Healthcare Workers Foundation (reg charity 1189737), UK

Nedyu Popivanov, Institute of Information and Communication Technologies, Bulgarian Academy of Sciences and Sofia University, Sofia, Bulgaria

Nikolas Popper, Centre for Computational Complex Systems, Technical University of Vienna, Vienna, Austria

Panu Poutvaara, Ludwig-Maximilians-University of Munich and ifo Institute – Leibniz Institute for Economic Research at the University of Munich, Munich, Germany

Barbara Prainsack, Department of Political Science, University of Vienna Austria, and Department of Global Health & Social Medicine, King's College London, UK

Viola Priesemann, Max Planck Institute for Dynamics and Self-Organization, Göttingen, Germany

Edmond Puca, Service of Infectious Disease, University Hospital Center "Mother Teresa", Tirane, Albania

Elisabeth Puchhammer-Stöckl, Center of Virology, Medical University Vienna, Austria

Krzysztof Pyrc, Malopolska Centre of Biotechnology, Jagiellonian University, Krakow, Poland

Athina Pyrpasopoulou, 2nd Propedeutic Dept of Internal Medicine, Hippokration General Hospital, Thessaloniki Greece

Prashanth Ramesh, Max Planck Institute for Dynamics and Self-Organization, Germany

Maja Ravnikar, Department of Biotechnology and Systems Biology, National Institute of Biology Ljubljana, Slovenia

Monika Redlberger-Fritz, Center for Virology, Medical University Vienna, Vienna, Austria

Stephen Reicher, Bishop Wardlaw Professor, School of Psychology and Neuroscience, University of St. Andrews, UK

Robert Repnik, Director of Slovenian Research Agency, Ljubljana, Slovenia

Walter Ricciardi, Università Cattolica del Sacro Cuore, Rome, Italy

Antti Ripatti, University of Helsinki, Helsinki GSE, Helsinki, Finland

Michaël Rochoy, médecin généraliste - collectifs Stop-Postillons et Du Côté de la science, Université de Lille, Lille, France

Joacim Rocklöv, Department of Public Health and Clinical Medicine, Section of Sustainable Health, Umeå University, Umeå, Sweden

Emmanuel Roilides, 3rd Department of Pediatrics, Aristotle University School of Health Sciences, Hippokration General Hospital, Thessaloniki, Greece

Magdalena Rosińska, Department of Infectious Disease Epidemiology and Surveillance, National Institute of Public Health- National Institute of Hygiene, Warsaw, Poland

Jeremy S. Rossman, School of Biosciences, University of Kent, UK

Dietrich Rothenbacher, Institute of Epidemiology and Medical Biometry, Ulm University, Ulm, Germany

Anna Rotkirch, Population Research Institute, Väestöliitto, Family Federation of Finland, Helsinki, Finland

Ganna Rozhnova, University Medical Center Utrecht, Utrecht, The Netherlands and BioISI—Biosystems & Integrative Sciences Institute, Faculdade de Ciências, Universidade de Lisboa, Lisboa, Portugal

Marjan Slak Rupnik, Center for physiology and pharmacology, Vienna, Austria

Kristi Rüütel, National Institute for Health Development, Tallinn, Estonia

Sarah Rasmussen, University of Cambridge, Cambridge, UK

Richard Russel, Respiratory Medicine, Nuffield Department of Medicine, University Of Oxford, Oxford, UK

Paola Russo, Institute of Food Sciences, CNR, Avellino, Italia

Tomás Ryan, School of Biochemistry and Immunology and Trinity College Institute of Neuroscience, Trinity College Dublin, Ireland

Andrzej Rychard, Institute of Philosophy and Sociology, PAS, Warsaw, Poland

Olivier Saint-Lary, Family medicine University Versailles Saint Quentin en Yvelines (UVSQ), Scientific Council of the French National College of Teachers in General Practice (CNGE), Montigny le Bretonneux, France

Francesco Sannino, Federico II Univ. of Napoli, Italy, Centre of Excellence for Particle Physics and Cosmology (CP3-Origins) at the University of Southern Denmark, and Danish Institute for Advanced Study, Denmark

Naveed Sattar, University of Glasgow, Glasgow, UK

Wim Schellekens, former Chief Inspector, Dutch Healthcare Inspectorate and Dutch RedTeam, The Netherlands

Eva Schernhammer, Department of Epidemiology, Center for Public Health, Medical University of Vienna, Vienna, Austria

Daniela Schmid, Agency for Health and Food Safety, Institute for Infectious Disease Epidemiology, Vienna, Austria

Alexander Schmidt, Max Planck Institute for Dynamics and Self-Organization, Max-Planck Institute of Experimental Medicine and Campus Institute for Dynamics of Biological Networks, Göttingen, Germany

Matthias F. Schneider, Department of Physics, Medical and Biological Physics, Technical University of Dortmund, Germany

Reinhard Schneider, Bioinformatics, Bioinformatics core facility, LCSB Belval, Luxembourg

Lisa Seekircher, Medical University of Innsbruck, Innsbruck, Austria

Puneet Sharma, DCF, Max Planck Institute for Dynamics and Self Organization, Goettingen, Germany

Alfonso Siani, Institute of Food Sciences, CNR, Avellino, Italia

Alessandro Siani, School of Biological Sciences, University of Portsmouth, Portsmouth, UK

Jari Siironen, Head of Neurointensive care, Neurosurgery, Helsinki University Hospital, Helsinki, Finland

Louise Sigfrid, Centre for Tropical Medicine and Global Health, University of Oxford, Oxford, UK

Ranko Škrbić, Department of Pharmacology, Toxicology and Clinical Pharmacology, Faculty of Medicine, University of Banja Luka, Banja Luka, Bosnia and Herzegovina

Alexander Skupin, Systems Biology, Luxembourg Institute for Systems Biomedicine, University of Luxembourg, Belval, Luxembourg

Mitja Slavinec, Dean of Faculty of Natural Sciences and Mathematics, University of Maribor, Maribor, Slovenia

Peter Slagter, Data analyst, Dutch RedTeam, The Netherlands

Bert Slagter, Complexity & uncertainty, Dutch RedTeam, The Netherlands

Rhonda Smith, Minerva Communications UK, Andover, UK

Anthony Staines, School of Nursing, Psychotherapy and Community Health, Dublin City University, Dublin, Ireland

Thomas Stamminger, Ulm University Medical Center, Institute of Virology, Ulm, Germany

Andraž Stožer, Institute of Physiology, Faculty of Medicine, University of Maribor, Maribor, Slovenia

Diana Strüver, MPI für Dynamik und Selbstorganisation, Germany

Anita Schöbel, TU Kaiserslautern und Fraunhofer Institut für Techno- und Wirtschaftsmathematik, Kaiserslautern, Germany

Markus Scholz, Institute for Medical Informatics, Statistics and Epidemiology, University of Leipzig, Leipzig, Germany

Ewa Szczurek, Faculty of Mathematics, Informatics and Mechanics, University of Warsaw, Warsaw, Poland

Thomas Szekeres, Department of Laboratory diagnostics, Clinical Institute for Laboratory diagnostics, Vienna, Austria

Iztok Takač, Dean of Faculty of Medicine, University of Maribor, Maribor, Slovenia

Volker Thiel, Vetsuisse Faculty, University of Bern, and Institute of Virology and Immunology, Bern, Switzerland

Stefan Thurner, Medical University of Vienna and Complexity Science Hub Vienna, Austria

Jörg Timm, University Hospital Düsseldorf, Heinrich-Heine-University, Institute of Virology, Düsseldorf, Germany

Martin Tobin, Department of Health Sciences, George Davies Centre, University of Leicester, Leicester, UK

Ludvik Toplak, President of Alma Mater Europaea, Maribor, Slovenia

Irene Tosetti, LSHTM and FMH, Vézenaz, Switzerland

Maja Travar, Department of Clinical Microbiology, University Clinical Center of Republic of Srpska, Banja Luka, Bosnia and Herzegovina

Lena Tschiderer, Medical University of Innsbruck, Innsbruck, Austria

Vytautas Usonis, "Paediatrician, paediatric infectious diseases", Clinic of Children Diseases, Vilnius University, Vilnius, Lithuania

Pierre Van Damme, University of Antwerp, Antwerp, Belgium

Omer Van den Bergh, University of Leuven - KU Leuven, Leuven, Belgium

Wim van Saarloos, Department of Physics, Instituut-Lorentz, Leiden, The Netherlands

Olli Vapalahti, Departments of Virology and Veterinary Biosciences, University of Helsinki Helsinki, Finland

Cyrille Vartanian, Université de Nantes, Nantes, France

Toomas Veidebaum, Research Director of Department of Chronic Diseases, National Institute for Health Development, Tallinn, Estonia

Svetlana Atanasova Velizarova, MHATLD "St. Sofia", Children department, Medical University - Sofia, Sofia, Bulgaria

Erika Vlieghe, Department of General Internal Medicine, Infectious and Tropical diseases, University Hospital Antwerp, University of Antwerp, Institute of Tropical Medicine, Antwerp, Belgium

Martin Vodopivec, Marine Biology Station, National Institute of Biology, Ljubljana, Slovenia

Oswald Wagner, Department of Laboratory Medicine, Medical University of Vienna, Vienna, Austria

Peter Walger, German Society of Hospital Hygiene, Berlin - Bonn, Germany

Friedemann Weber, Justus Liebig University Giessen, Institute for Virology, FB10 Veterinary Medicine, Giessen, Germany

Wolfgang Weninger, Dermatology, Medical University of Vienna, Vienna, Austria

Robert West, Behavioural Science and Health, University College London, London, UK

Matthias Wibral, School of Business and Economics, Maastricht University, The Netherlands

Michael Wibral, Campus Institute Dynamics of Biological Networks, Georg-August University, Göttingen, Germany

Lothar Wieler, President of the Robert Koch - Institute, Berlin, Germany

Janneke van de Wijgert, Julius Center of Health Sciences and Primary Care, Utrecht, The Netherlands

Peter Willeit, Clinical Epidemiology Team, Medical University of Innsbruck, Innsbruck, Austria

Paul Wilmes, Luxembourg Centre for Systems Biomedicine & Department of Life Sciences and Medicine, Faculty of Science, Technology and Medicine, University of Luxembourg, Luxembourg

Jim Wilson, University of Edinburgh, Edinburgh, UK

Marvin N. Wright, Leibniz Institute for Prevention Research and Epidemiology - BIPS, Bremen, Germany

Kit Yates, Co-Director of the Centre for Mathematical Biology, University of Bath, and IndieSAGE, UK

Christiane Woopen, Cologne Center for Ethics, Rights, Economics, and Social Sciences of Health (CERES), University of Cologne, Cologne, Germany

Boštjan Zalar, Director of Institut Jožef Stefan, Ljubljana, Slovenia

Hajo Zeeb, Leibniz Institute for Prevention Research and Epidemiology - BIPS, Bremen, Germany

Janez Zibert, Faculty of Health Sciences, University of Ljubljana, Slovenia
